# Supplementary material for: The Fabrication of Cesium Lead Bromide-Coated Cellulose Nanocomposites and Their Effect on the Detection of Nitrogen Gas
Source: MDPI journal article supplement (doi:10.3390/s22207737), 2022-10-12
Supplement: s1 [file s1]

# The Fabrication of Cesium Lead Bromide-Coated Cellulose Nanocomposites and Their Effect on the Detection of Nitrogen Gas

Bumjun Park <sup>1,†</sup>, Haneul Kang <sup>1,†</sup>, Soobin Han <sup>1</sup>, Hyeong-U Kim <sup>2</sup>, Youngjin Cho <sup>3,\*</sup>,  
Yun Suk Huh <sup>1,\*</sup> and Sung-Min Kang <sup>4,5,\*</sup>

<sup>1</sup> Department of Biological Sciences and Bioengineering, Inha University, 100 Inha-ro, Michuhol-gu, Incheon 22212, Korea

<sup>2</sup> Department of Plasma Engineering, Korea Institute of Machinery & Materials, Daejeon 34103, Korea

<sup>3</sup> Food Safety and Distribution Research Group, Korea Food Research Institute, 245 Nongsaengmyeong-ro, Iseo-myeon, Wanju-gun 55365, Jeollabuk-do, Korea

<sup>4</sup> Department of Green Chemical Engineering, Sangmyung University, 31 Sangmyungdae-gil, Cheonan 31066, Chungcheongnam-do, Korea

<sup>5</sup> Future Environment and Energy Research Institute, Sangmyung University, 31 Sangmyungdae-gil, Cheonan 31066, Chungcheongnam-do, Korea

\* Correspondence: yjcho74@kfri.re.kr (Y.C.); yunsuk.huh@inha.ac.kr (Y.S.H.); smkang@smu.ac.kr (S.-M.K.)

† These authors contributed equally to this work.

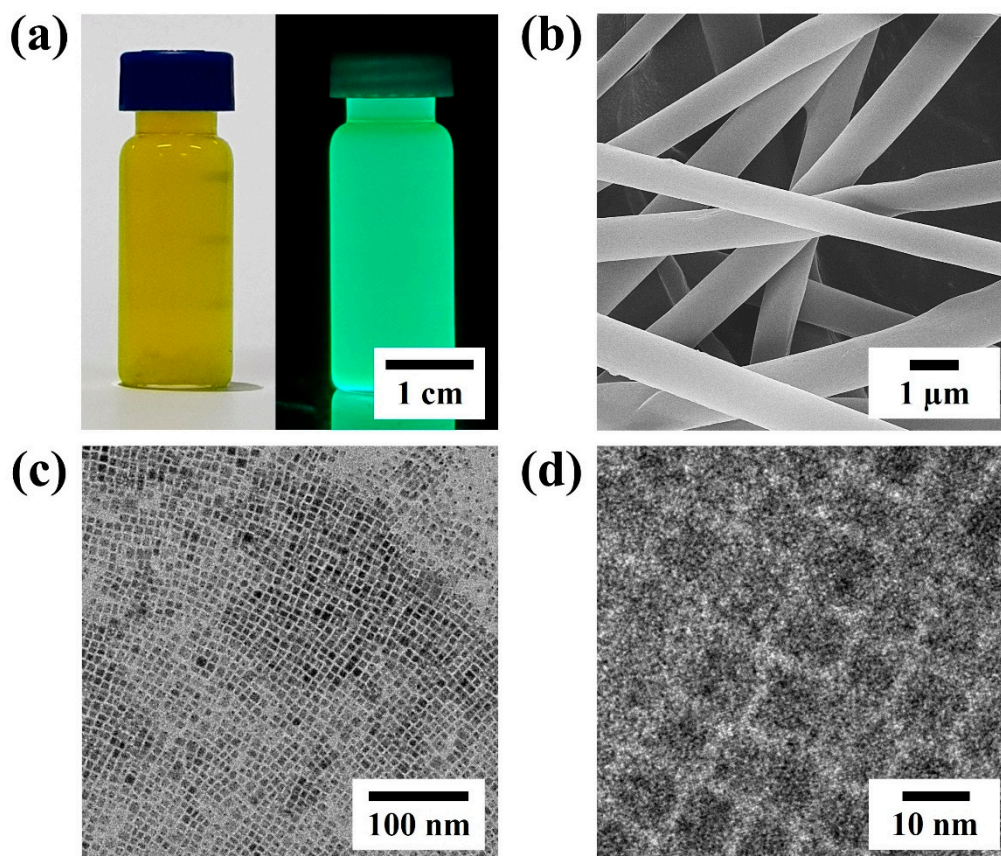

**Figure S1.** Morphological characterization; **(a)** CsPbBr<sub>3</sub> NCs under visible light and UV field, **(b)** scanning electron microscopy (SEM) image of CNFs, and transmission electron microscopy (TEM) image of CsPbBr<sub>3</sub> NCs at **(c)** low and **(d)** high magnification.

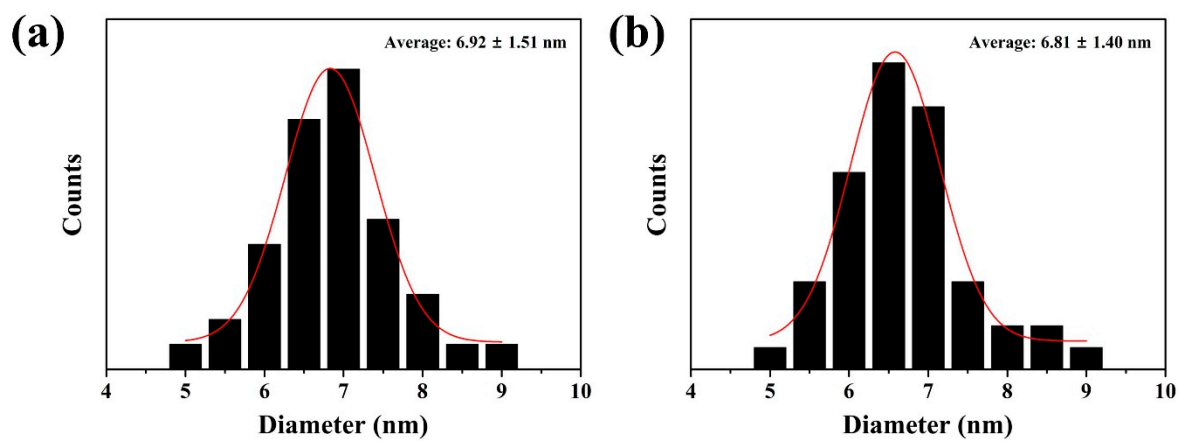

**Figure S2.** Size distribution graph of (a) CsPbBr<sub>3</sub> NCs and (b) NCs attached on the surface of CNFs.

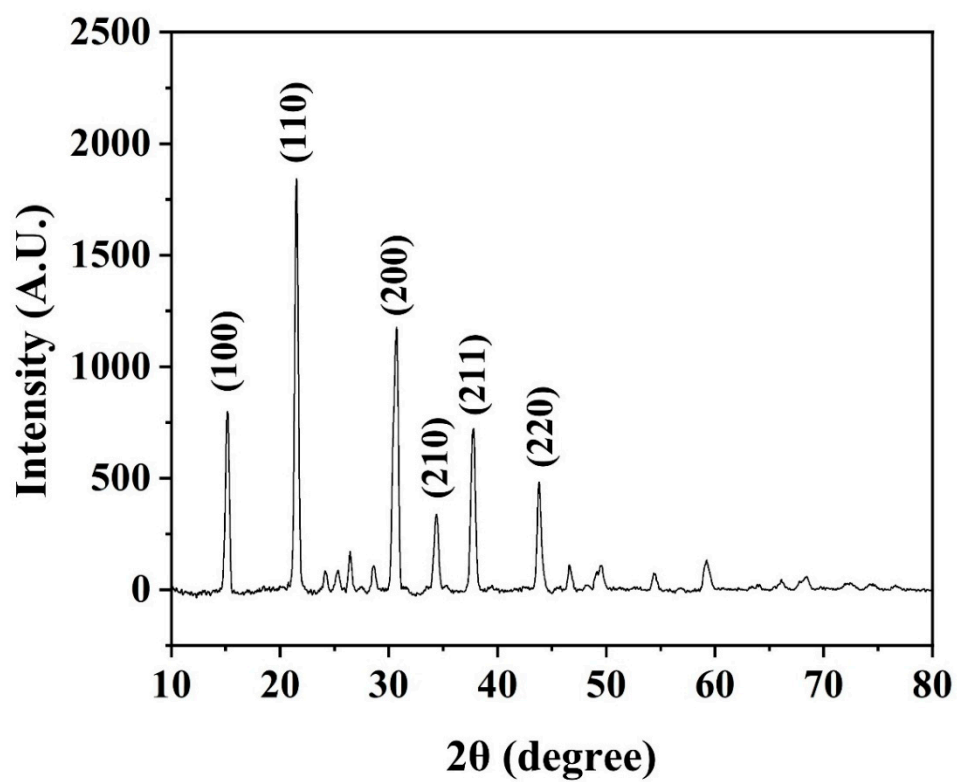

**Figure S3.** X-ray diffraction (XRD) pattern of fabricated CsPbBr<sub>3</sub> NCs through hot injection method.

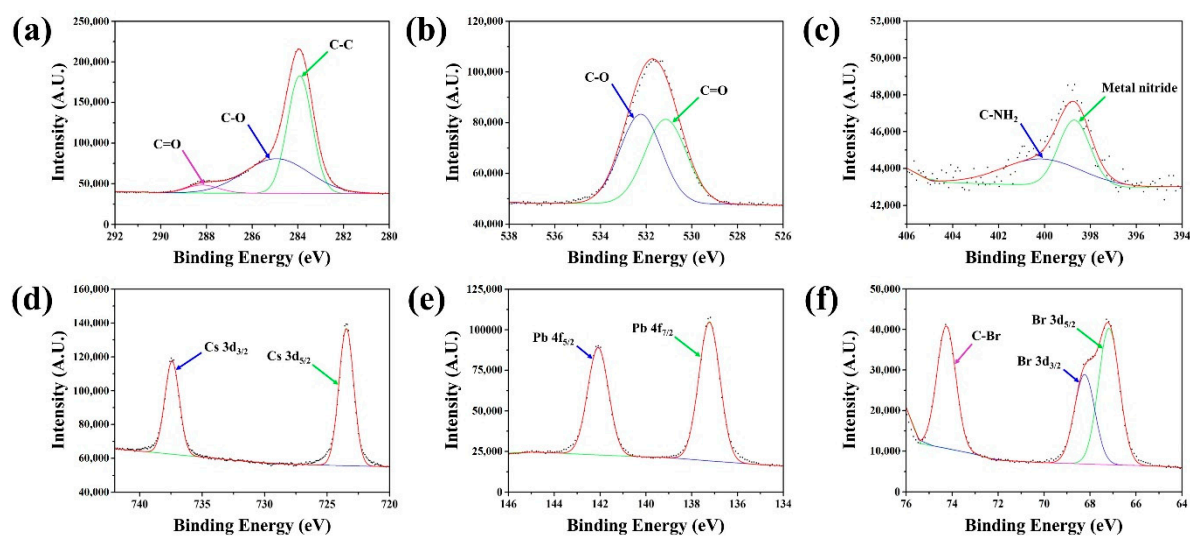

**Figure S4.** Narrow X-ray photoelectron spectroscopic (XPS) scan of (a) C 1s, (b) O 1s, (c) N 1s, (d) Cs 3d, (e) Pb 4f, and (f) Br 3d for CsPbBr<sub>3</sub> NFs.

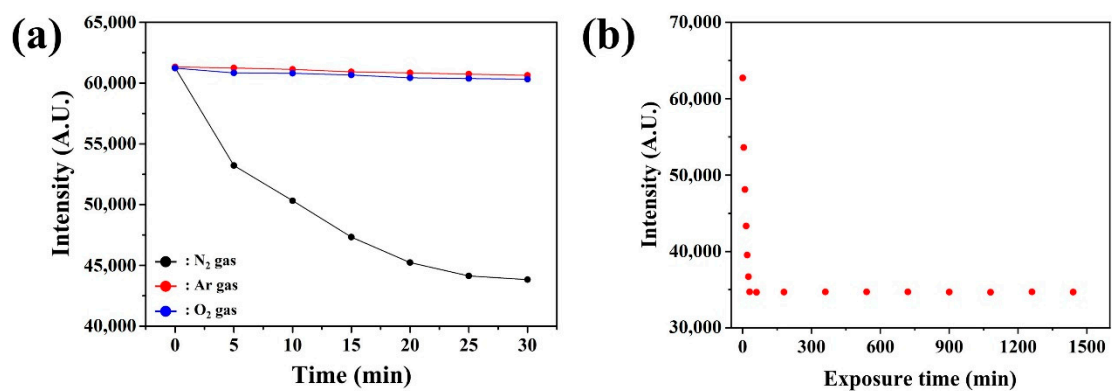

**Figure S5.** (a) Selectivity of fabricated gas sensor with various gas at a concentration of 10 ppm, and (b) repeatability analysis of fabricated gas sensors under atmosphere after detection of nitrogen gas.

**Table S1.** Deconvolution of the XPS spectra.

| Elemental composition |                      | Binding energy (eV) |
|-----------------------|----------------------|---------------------|
| C 1s                  | C–C                  | 283.93              |
|                       | C–O                  | 285.45              |
|                       | C=O                  | 288.22              |
| O 1s                  | C=O                  | 531.12              |
|                       | C–O                  | 532.22              |
| N 1s                  | Metal nitride        | 398.78              |
|                       | C–NH <sub>2</sub>    | 400.61              |
| Cs 3d                 | Cs 3d <sub>5/2</sub> | 723.43              |
|                       | Cs 3d <sub>3/2</sub> | 737.41              |
| Pb 4f                 | Pb 4f <sub>7/2</sub> | 137.22              |
|                       | Pb 4f <sub>5/2</sub> | 142.06              |
| Br 3d                 | Br 3d <sub>5/2</sub> | 67.19               |
|                       | Br 3d <sub>3/2</sub> | 68.10               |
|                       | C–Br                 | 74.24               |

**Table S2.** Comparison of gas sensors for detection of various types of nitrogen gas.

| <b>Analytical technique</b>                                 | <b>Detecting gas</b> | <b>LOD (<math>\mu\text{M}</math>)</b> | <b>Ref.</b> |
|-------------------------------------------------------------|----------------------|---------------------------------------|-------------|
| Absorption spectra measurement                              | $\text{NH}_3$        | 58.72                                 | [37]        |
| Electrochemical measurement                                 | $\text{NO}$          | 10.00                                 | [38]        |
| Amplified chemoresistor measurement                         | $\text{NO}_2$        | 0.22                                  | [39]        |
| CsPbBr <sub>3</sub> NFs-based photoluminescence measurement | $\text{N}_2$         | 28.57                                 | This work   |
